# Supplementary material for: Prognostic performance of examined lymph nodes, lymph node ratio, and positive lymph nodes in gastric cancer: a competing risk model study
Source: Front Endocrinol (Lausanne). 2025 Feb 21;16:1434999. doi: 10.3389/fendo.2025.1434999 (PMC11885136; doi:10.3389/fendo.2025.1434999)
Supplement: Supplementary file 7 [file Table3.xlsx]

## Sheet: Sheet1
TABLE S3 Forest plot of subgroup analyses and interaction tests of DSS in normal model.
	LNR					ELN					pN
	Subgroup analysis			Interaction test		Subgroup analysis			Interaction test		Subgroup analysis			Interaction test
Variables	HR (95% CI)	P-value		P-value		HR (95% CI)	P-value		P-value		HR (95% CI)	P-value		P-value
Age											NA
24~39	1.118 (0.070-17.952)	0.937		Reference		1.443 (0.090-23.242)	0.796		Reference
40~59	1.966 (0.907-4.265)	0.087		0.899		0.433 (0.195-0.961)	0.04		0.683
60~88	1.439 (0.868-2.385)	0.158		0.95		0.847 (0.512-1.400)	0.517		0.996
Sex
Female	0.963 (0.422-2.201)	0.93		Reference		0.882 (0.387-2.014)	0.766		Reference		1.030 (0.138-7.684)	0.977		Reference
Male	1.917 (1.170-3.139)	0.01		0.144		0.659 (0.400-1.084)	0.1		0.547		3.649 (1.323-10.065)	0.012		0.228
Race
White	1.479 (0.879-2.489)	0.141		Reference		0.728 (0.431-1.230)	0.235		Reference		2.410 (0.586-9.901)	0.223		Reference
Black	2.165 (0.747-6.278)	0.155		0.572		0.511 (0.176-1.484)	0.217		0.612		3.512 (0.780-15.816)	0.102		0.76
Others	1.430 (0.495-4.127)	0.509		0.955		0.999 (0.371-2.686)	0.998		0.6		1.170 (0.153-8.951)	0.88		0.573
Marital status
Married	1.115 (0.647-1.925)	0.695		Reference		0.863 (0.497-1.500)	0.602		Reference		3.041 (0.736-12.572)	0.125		Reference
Divorced/Separated	2.448 (0.516-11.611)	0.26		0.272		0.538 (0.151-1.917)	0.339		0.363		2.498 (0.308-20.259)	0.391		0.893
Single/Unmarried	3.109 (1.028-9.396)	0.044		0.116		0.331 (0.110-0.996)	0.049		0.096		2.188 (0.284-16.879)	0.453		0.994
Widowed/Others	2.594 (0.866-7.770)	0.089		0.137		0.887 (0.311-2.534)	0.823		0.943		1.110 (0.144-8.552)	0.92		0.448
Year of diagnosis											NA
2010	2.426 (0.928-6.339)	0.071		Reference		0.423 (0.162-1.107)	0.08		Reference
2011	2.122 (0.898-5.016)	0.087		0.956		0.581 (0.251-1.346)	0.205		0.689
2012	2.059 (0.703-6.030)	0.188		0.914		0.557 (0.189-1.641)	0.289		0.833
2013	0.943 (0.304-2.927)	0.919		0.253		0.839 (0.252-2.796)	0.775		0.375
2014	0.630 (0.196-2.018)	0.436		0.097		1.484 (0.497-4.436)	0.48		0.104
2015	2.782 (0.663-11.666)	0.162		0.831		0.890 (0.222-3.571)	0.869		0.455
AJCC stage											NA
IIa	1.960 (0.645-5.952)	0.235		Reference		1.190 (0.413-3.430)	0.747		Reference
IIb	1.567 (0.997-2.463)	0.052		0.897		0.660 (0.417-1.044)	0.076		0.3
T stage
T1	3.290 (1.034-10.468)	0.044		Reference		0.600 (0.214-1.682)	0.332		Reference		2.473 (0.546-11.208)	0.24		Reference
T2	1.202 (0.622-2.324)	0.583		0.152		0.662 (0.340-1.290)	0.226		0.998		2.853 (0.388-20.974)	0.303		0.882
T3	1.619 (0.862-3.042)	0.134		0.307		0.852 (0.450-1.614)	0.623		0.652		2.517 (0.603-10.509)	0.206		0.963
N stage
N1	1.829 (1.165-2.871)	0.009		Reference		0.659 (0.414-1.048)	0.078		Reference		2.787 (0.878-8.852)	0.082		Reference
N2~N3	1.156 (0.149-8.963)	0.889		0.778		1.230 (0.412-3.676)	0.711		0.308		2.184 (0.475-10.038)	0.316		0.688
Radiotherapy
No/NA	1.720 (0.877-3.374)	0.115		Reference		0.886 (0.451-1.740)	0.726		Reference		1.762 (0.422-7.368)	0.438		Reference
Yes	1.632 (0.954-2.790)	0.074		0.824		0.563 (0.323-0.980)	0.042		0.375		2.603 (0.809-8.374)	0.109		0.745
Surgical procedure
TG	1.247 (0.565-2.751)	0.585		Reference		0.645 (0.284-1.463)	0.294		Reference		6.537 (1.480-28.869)	0.013		Reference
Others	0.647 (0.127-3.287)	0.6		0.472		0.878 (0.219-3.519)	0.855		0.72		2.107 (0.256-17.370)	0.489		0.528
PG/DG	1.917 (1.123-3.274)	0.017		0.426		0.714 (0.421-1.212)	0.213		0.812		1.344 (0.327-5.524)	0.682		0.121
Grade						NA					NA
I~II	1.088 (0.554-2.134)	0.807		Reference
III~IV	2.166 (1.241-3.780)	0.007		0.108
Unknown	0.421 (0.038-4.657)	0.48		0.426
Multiple lesions											NA
No	1.747 (1.132-2.696)	0.012		Reference		0.607 (0.392-0.941)	0.025		Reference
Yes	0.301 (0.034-2.701)	0.284		0.122		4.401 (0.488-39.663)	0.187		0.076
DSS, disease-specific survival; CRM, competing risk model; HR, hazard ratio; CI, confidence interval; LNR, lymph node ratio; ELN, examined lymph node; pN, positive lymph node; AJCC, American Joint Committee on Cancer; NA, not available; TG, total gastrectomy; PG/DG, proximal/distal gastrectomy.
